# Supplementary material
Source: HighWire-hosted journal article supplement (https://erj.ersjournals.com/content/55/3/1901967)
Supplement: inline-supplementary-material-1 [file inline-supplementary-material-1.pdf]

## Appendix 1. Search strategy

Pubmed

|    |                                                                                                                                                                                                                                                                                                                                                                                                                                                                                                                                                                                                                                                                                                                                                                                                                                                                                                                                                                                                                                                                                                                                                                                                                                                                                                                                                                                                                                                                                                                                                                                                                                                                                                                                                                                                                                                                                                                                                                                                                                                                                                                                                                                                                                                                                                                                                                                                                                                                                                                                                                                                                                                                                                                                                                                                                                                                                                                                                                                                                                                                                                                                                                                                                                                                                                                                                                                                                                                                                                                                                                                                                                                                                                                  |
|----|------------------------------------------------------------------------------------------------------------------------------------------------------------------------------------------------------------------------------------------------------------------------------------------------------------------------------------------------------------------------------------------------------------------------------------------------------------------------------------------------------------------------------------------------------------------------------------------------------------------------------------------------------------------------------------------------------------------------------------------------------------------------------------------------------------------------------------------------------------------------------------------------------------------------------------------------------------------------------------------------------------------------------------------------------------------------------------------------------------------------------------------------------------------------------------------------------------------------------------------------------------------------------------------------------------------------------------------------------------------------------------------------------------------------------------------------------------------------------------------------------------------------------------------------------------------------------------------------------------------------------------------------------------------------------------------------------------------------------------------------------------------------------------------------------------------------------------------------------------------------------------------------------------------------------------------------------------------------------------------------------------------------------------------------------------------------------------------------------------------------------------------------------------------------------------------------------------------------------------------------------------------------------------------------------------------------------------------------------------------------------------------------------------------------------------------------------------------------------------------------------------------------------------------------------------------------------------------------------------------------------------------------------------------------------------------------------------------------------------------------------------------------------------------------------------------------------------------------------------------------------------------------------------------------------------------------------------------------------------------------------------------------------------------------------------------------------------------------------------------------------------------------------------------------------------------------------------------------------------------------------------------------------------------------------------------------------------------------------------------------------------------------------------------------------------------------------------------------------------------------------------------------------------------------------------------------------------------------------------------------------------------------------------------------------------------------------------------|
| #1 | "Isoniazid"[Mesh] OR isoniazid [TW] OR andrazide[TW] OR antimic[TW] OR antimicina[TW] OR antimicine[TW] OR antituberkulosum trogalen[TW] OR apacizina [TW] OR armacide[TW] OR armazide[TW] OR atcotibin[TW] OR atcotibine[TW] OR azuren[TW] OR cedin[TW] OR cedin aerosol[TW] OR cemidon[TW] OR chemiazid[TW] OR chemidon[TW] OR cin vis[TW] OR cortinazine[TW] OR cotinazin[TW] OR cotinazine[TW] OR cotinizin[TW] OR cotinazine[TW] OR curazid forte[TW] OR defonin[TW] OR dianicotyl[TW] OR diazid[TW] OR dibutin[TW] OR diforin[TW] OR dinacrin[TW] OR ditubin[TW] OR dowa-isoniazid[TW] OR ebidene[TW] OR eralon[TW] OR eralone[TW] OR ertuban[TW] OR europlex[TW] OR eutizon[TW] OR eutizone[TW] OR evalon[TW] OR fimalene[TW] OR fimaline[TW] OR fsr 3[TW] OR fsr3 [TW] OR gink[TW] OR hain[TW] OR hiconyl[TW] OR hidraciber[TW] OR hidranizil[TW] OR hidrasonil[TW] OR hidrazida[TW] OR hidrazida i.n.[TW] OR hidrulte[TW] OR hycozid[TW] OR hycozide[TW] OR hydrasonil[TW] OR hydrazid[TW] OR hydrazid polfa[TW] OR hydrazide polfa[TW] OR hydrazin[TW] OR hyzyd[TW] OR ido tebin[TW] OR idrazil inh[TW] OR in 73[TW] OR inah[TW] OR INH [TI] OR inh burgthal [TW] OR inh intoxication[TW] OR inh toxicity[TW] OR inizid[TW] OR inizide[TW] OR iscotin [TW] OR iscotine[TW] OR isidrina[TW] OR isidrine[TW] OR ismazide[TW] OR isobicina[TW] OR isobicine[TW] OR isocid[TW] OR isocidene[TW] OR isocotin[TW] OR isocotine[TW] OR isokin [TW] OR isokin t [TW] OR isolyn[TW] OR isolyne[TW] OR isomazide[TW] OR isomerina[TW] OR isonerit[TW] OR isonex [TW] OR isoniac[TW] OR isoniacid[TW] OR isoniazid atlantic[TW] OR isoniazid excretion[TW] OR isoniazid intoxication[TW] OR isoniazid sensitivity[TW] OR isoniazid toxicity[TW] OR isoniazida n.t.[TW] OR isoniazide[TW] OR isoniazidine[TW] OR isoniazidum[TW] OR isoniazone[TW] OR isonicazid[TW] OR isonicazide[TW] OR isonicid[TW] OR isonicide[TW] OR isonicotan[TW] OR isonicotane[TW] OR isonicotic acid hydrazide[TW] OR isonicotil[TW] OR isonicotinic acid hydrazide[TW] OR isonicotinic acid hydrazine[TW] OR isonicotinic hydrazide[TW] OR isonicotinohydrazide[TW] OR isonicotinoylhydrazine[TW] OR isonicotinylhydrazide[TW] OR isonicotinylhydrazine[TW] OR isonide[TW] OR isonidrin[TW] OR isonidrine[TW] OR isonikazid[TW] OR isonikazide[TW] OR isonilex[TW] OR isonilyd[TW] OR isonin[TW] OR isonindon[TW] OR isonindone[TW] OR isonine[TW] OR isonirit[TW] OR isonisin[TW] OR isonisine[TW] OR isoniton[TW] OR isonitone[TW] OR isonivit[TW] OR isonizide[TW] OR isopharmide[TW] OR isotamine[TW] OR isotebe[TW] OR isotebezid[TW] OR isotebezide[TW] OR isothiavit[TW] OR isotinyl[TW] OR isozide[TW] OR isozin[TW] OR isozine[TW] OR isozone[TW] OR isozyd[TW] OR isozyde[TW] OR izoniazid[TW] OR laniazid[TW] OR medic aid isoniazid[TW] OR micosan[TW] OR micosane[TW] OR milazide[TW] OR mybasan[TW] OR mybasane[TW] OR neoteben[TW] OR neotebene[TW] OR neoxin[TW] OR neoxine[TW] OR neoxon[TW] OR neoxone[TW] OR neumandin[TW] OR nevin[TW] OR niadrin[TW] OR nicatibine[TW] OR nicazid[TW] OR nicazide[TW] OR nicetal[TW] OR nicizina[TW] OR nicodrin[TW] OR niconyl[TW] OR nicosciorin[TW] OR nicotibin[TW] OR nicotibina[TW] OR nicotibine [TW] OR nicotubin[TW] OR nicotubine[TW] OR nicozid[TW] OR nicozide [TW] OR nicozyd[TW] OR nidaton[TW] OR nidrazid[TW] OR nidrazide[TW] OR nikozid[TW] OR nikozide[TW] OR niosciorine[TW] OR niplen[TW] OR nitadon[TW] OR niteban[TW] OR nortibina[TW] OR nortibine[TW] OR nydrazid[TW] OR nydrazide [TW] OR nyscozid[TW] OR nyscozide[TW] OR pelazid[TW] OR pelazide[TW] OR percin[TW] OR phthisen[TW] OR pms isoniazid[TW] OR puran[TW] OR pycazide[TW] OR pyreazid[TW] |
|----|------------------------------------------------------------------------------------------------------------------------------------------------------------------------------------------------------------------------------------------------------------------------------------------------------------------------------------------------------------------------------------------------------------------------------------------------------------------------------------------------------------------------------------------------------------------------------------------------------------------------------------------------------------------------------------------------------------------------------------------------------------------------------------------------------------------------------------------------------------------------------------------------------------------------------------------------------------------------------------------------------------------------------------------------------------------------------------------------------------------------------------------------------------------------------------------------------------------------------------------------------------------------------------------------------------------------------------------------------------------------------------------------------------------------------------------------------------------------------------------------------------------------------------------------------------------------------------------------------------------------------------------------------------------------------------------------------------------------------------------------------------------------------------------------------------------------------------------------------------------------------------------------------------------------------------------------------------------------------------------------------------------------------------------------------------------------------------------------------------------------------------------------------------------------------------------------------------------------------------------------------------------------------------------------------------------------------------------------------------------------------------------------------------------------------------------------------------------------------------------------------------------------------------------------------------------------------------------------------------------------------------------------------------------------------------------------------------------------------------------------------------------------------------------------------------------------------------------------------------------------------------------------------------------------------------------------------------------------------------------------------------------------------------------------------------------------------------------------------------------------------------------------------------------------------------------------------------------------------------------------------------------------------------------------------------------------------------------------------------------------------------------------------------------------------------------------------------------------------------------------------------------------------------------------------------------------------------------------------------------------------------------------------------------------------------------------------------------|

|    |                                                                                                                                                                                                                                                                                                                                                                                                                                                                                                                                                                                                                                                                                                                                                                                                                                                                                                                                                                                                                                                                                                                                                                                                                                                                                                                                                                                                                                                                                                                                                                                                                                                                                 |
|----|---------------------------------------------------------------------------------------------------------------------------------------------------------------------------------------------------------------------------------------------------------------------------------------------------------------------------------------------------------------------------------------------------------------------------------------------------------------------------------------------------------------------------------------------------------------------------------------------------------------------------------------------------------------------------------------------------------------------------------------------------------------------------------------------------------------------------------------------------------------------------------------------------------------------------------------------------------------------------------------------------------------------------------------------------------------------------------------------------------------------------------------------------------------------------------------------------------------------------------------------------------------------------------------------------------------------------------------------------------------------------------------------------------------------------------------------------------------------------------------------------------------------------------------------------------------------------------------------------------------------------------------------------------------------------------|
|    | OR pyreazide[TW] OR pyricidin[TW] OR pyricidine[TW] OR pyridine 4 carbohydrazide[TW] OR pyridine 4 carbonic acid hydrazide[TW] OR pyridine 4 carboxyhydrazide[TW] OR pyrizidin[TW] OR pyrizidine[TW] OR ramnanon[TW] OR raumanon[TW] OR retozide[TW] OR rhymicid[TW] OR rimicid [TW] OR rimicide[TW] OR rimifon [TW] OR rimitsid[TW] OR robisellin[TW] OR robiselline[TW] OR roxyfen miquel[TW] OR rp 5015[TW] OR ru ef tb[TW] OR sanohydrazina[TW] OR sanohydrazine[TW] OR santerazid[TW] OR santerazide[TW] OR sauterazid[TW] OR serum isoniazid[TW] OR stanozide[TW] OR supercidin[TW] OR t.b. razide[TW] OR tb phlogin [TW] OR tb phlogin heyl[TW] OR tb vis[TW] OR tebecid[TW] OR tebecide[TW] OR tebecin[TW] OR tebecine[TW] OR tebenic[TW] OR tebesium[TW] OR tebetracin[TW] OR tebetracine[TW] OR tebexin[TW] OR tebexine[TW] OR tebilon[TW] OR tebilone[TW] OR tebos[TW] OR teebaconin[TW] OR teebaconine[TW] OR tekazin[TW] OR tekazine[TW] OR thiocevit[TW] OR tibazide[TW] OR tibemid[TW] OR tibemide[TW] OR tibinide[TW] OR tibison[TW] OR tibisone[TW] OR tibitan[TW] OR tibitane[TW] OR tibivis[TW] OR tibizide[TW] OR tibusan[TW] OR tibusane[TW] OR tisin[TW] OR tisiodrazida[TW] OR tisiodrazide[TW] OR tisiotrazida[TW] OR tizide[TW] OR tubazid[TW] OR tubazide[TW] OR tubeco[TW] OR tubercid[TW] OR tuberian[TW] OR tuberiane[TW] OR tubicon[TW] OR tubicone[TW] OR tubilysin[TW] OR tubomel[TW] OR tubonil[TW] OR tubylisin[TW] OR tubylisine[TW] OR tyrid[TW] OR tyvid[TW] OR tyvide[TW] OR unicozyde[TW] OR valifol[TW] OR vazadrine[TW] OR vederon[TW] OR vederone[TW] OR vitazide[TW] OR yuhan-zid[TW] OR zinadon[TW] OR zinadone[TW] OR zonazide[TW] |
| #2 | "Pregnant Women"[Mesh] OR "Pregnancy"[Mesh] OR "Pregnancy Complications"[Mesh] OR "Maternal Health Services"[Mesh] OR "Mothers"[Mesh] OR "Maternal Death"[Mesh] OR "Maternal-Fetal Relations"[Mesh] OR "Maternal Exposure"[Mesh] OR "Maternal Mortality"[Mesh] OR "Maternal Behavior"[Mesh] OR pregnan* [TIAB] OR Maternal*[TIAB] OR mother*[TIAB] OR child bearing [TIAB] OR perinatal [TIAB] OR Postnatal[TIAB] OR peri-natal [TIAB] OR post natal [TIAB] OR ante natal [TIAB] OR antenatal [TIAB] OR Postpartum [TIAB] OR puerperium [TIAB] OR post partum [TIAB] OR abortion* [TW] OR abortive [TW] OR "Abortion, Induced"[Mesh]                                                                                                                                                                                                                                                                                                                                                                                                                                                                                                                                                                                                                                                                                                                                                                                                                                                                                                                                                                                                                                            |
| #3 | "Tuberculosis"[Mesh] OR tuberculosis [TW] OR “Lupus Vulgaris ”[TIAB] OR “koch s disease ” [TW] OR tubercul*[TW] OR tuberculoma [TW] OR Silicotuberculosis [TW] OR "Tuberculosis Vaccines"[Mesh] OR "BCG Vaccine"[Mesh] OR ( calmette*[TW] AND vaccin*[TW]) OR "Tuberculin Test"[Mesh] OR Tuberculin [TW] OR "Mycobacterium tuberculosis"[Mesh] OR TB [Ti]                                                                                                                                                                                                                                                                                                                                                                                                                                                                                                                                                                                                                                                                                                                                                                                                                                                                                                                                                                                                                                                                                                                                                                                                                                                                                                                       |
| #4 | #1 AND #2 AND #3                                                                                                                                                                                                                                                                                                                                                                                                                                                                                                                                                                                                                                                                                                                                                                                                                                                                                                                                                                                                                                                                                                                                                                                                                                                                                                                                                                                                                                                                                                                                                                                                                                                                |

## EMBASE

|    |                                                                                                                                                                                                                                                                                                                                                                                                                                                                 |
|----|-----------------------------------------------------------------------------------------------------------------------------------------------------------------------------------------------------------------------------------------------------------------------------------------------------------------------------------------------------------------------------------------------------------------------------------------------------------------|
| #1 | 'isoniazid'/exp OR 'isoniazid'                                                                                                                                                                                                                                                                                                                                                                                                                                  |
| #2 | 'pregnant woman'/exp OR 'pregnancy'/exp OR 'child bearing':ti,ab OR 'childbearing':ti,ab OR pregnant:ti,ab OR pregnancy:ti,ab OR 'breast feeding education'/exp OR 'breastfed':ti,ab OR breastfeed*:ti,ab OR (breast NEXT/2 feed*) OR 'puerperium'/exp OR 'post partum':ti,ab OR postpartum:ti,ab OR 'ante natal':ti,ab OR prenatal:ti,ab OR postnatal:ti,ab OR 'postnatal':ti,ab OR lactat*:ti,ab OR 'prenatal drug exposure'/exp OR 'maternal exposure':ti,ab |
| #3 | 'tuberculosis'/exp OR tuberculosis:ab,ti OR tuberculoses:ab,ti OR tb:ab,ti                                                                                                                                                                                                                                                                                                                                                                                      |
| #4 | #1 AND #2 AND #3                                                                                                                                                                                                                                                                                                                                                                                                                                                |

|    |                                                                                                                                                                                                                                                                                                                                                                                                                                                                                                                                                                                                                                                                                                                                                                                                                                                                                                                                                                                                                                                                                                                                                                                                                                                                                                                                                                                                                                                                                                                                                                                                                                                                                                                                                                                                                                                                                                                                                                                                                                                                                                                                                                                                                                                                                                                                                                                                                                                                                                                                                                                                                                                                                                                                                                                                                                                                                                                                                                                                                                                                                                                                                                                                                                                                                                                                                                                                                                                                                                                                                                                                                                                                                                                                                                                                                                                                                                                                                                                                                                                                                                                                                                                                                                                                                       |
|----|---------------------------------------------------------------------------------------------------------------------------------------------------------------------------------------------------------------------------------------------------------------------------------------------------------------------------------------------------------------------------------------------------------------------------------------------------------------------------------------------------------------------------------------------------------------------------------------------------------------------------------------------------------------------------------------------------------------------------------------------------------------------------------------------------------------------------------------------------------------------------------------------------------------------------------------------------------------------------------------------------------------------------------------------------------------------------------------------------------------------------------------------------------------------------------------------------------------------------------------------------------------------------------------------------------------------------------------------------------------------------------------------------------------------------------------------------------------------------------------------------------------------------------------------------------------------------------------------------------------------------------------------------------------------------------------------------------------------------------------------------------------------------------------------------------------------------------------------------------------------------------------------------------------------------------------------------------------------------------------------------------------------------------------------------------------------------------------------------------------------------------------------------------------------------------------------------------------------------------------------------------------------------------------------------------------------------------------------------------------------------------------------------------------------------------------------------------------------------------------------------------------------------------------------------------------------------------------------------------------------------------------------------------------------------------------------------------------------------------------------------------------------------------------------------------------------------------------------------------------------------------------------------------------------------------------------------------------------------------------------------------------------------------------------------------------------------------------------------------------------------------------------------------------------------------------------------------------------------------------------------------------------------------------------------------------------------------------------------------------------------------------------------------------------------------------------------------------------------------------------------------------------------------------------------------------------------------------------------------------------------------------------------------------------------------------------------------------------------------------------------------------------------------------------------------------------------------------------------------------------------------------------------------------------------------------------------------------------------------------------------------------------------------------------------------------------------------------------------------------------------------------------------------------------------------------------------------------------------------------------------------------------------------------|
| #1 | <p>mh :(isoniazid) OR tw:(isoniazid ) OR tw:( andrazide) OR tw:( antimic) OR tw:( antimicina) OR tw:( antimicine) OR tw:( antituberkulosum trogalen) OR tw:( apacizina ) OR tw:( armacide) OR tw:( armazide) OR tw:( atcotibin) OR tw:( atcotibine) OR tw:( azuren) OR tw:( cedin) OR tw:( cedin aerosol) OR tw:( cemidon) OR tw:( chemiazid) OR tw:( chemidon) OR tw:( cin vis) OR tw:( cortinazine) OR tw:( cotinazin) OR tw:( cotinazine) OR tw:( cotinizin) OR tw:( cotinizine) OR tw:( curazid forte) OR tw:( defonin) OR tw:( dianicotyl) OR tw:( diazid) OR tw:( dibutin) OR tw:( diforin) OR tw:( dinacrin) OR tw:( ditubin) OR tw:( dow-isoniazid) OR tw:( ebidene) OR tw:( eralon) OR tw:( eralone) OR tw:( ertuban) OR tw:( europlex) OR tw:( eutizon) OR tw:( eutizone) OR tw:( evalon) OR tw:( fimalene) OR tw:( fimaline) OR tw:( fsr 3) OR tw:( fsr3 ) OR tw:( gink) OR tw:( hain) OR tw:( hiconyl) OR tw:( hidraciber) OR tw:( hidranizil) OR tw:( hidrasonil) OR tw:( hidrazida) OR tw:( hidrazida i.n.) OR tw:( hidrulte) OR tw:( hycozid) OR tw:( hycozide) OR tw:( hydrasonil) OR tw:( hydrazid) OR tw:( hydrazid polfa) OR tw:( hydrazide polfa) OR tw:( hydrazin) OR tw:( hyzyd) OR tw:( ido tebin) OR tw:( idrazil inh) OR tw:( in 73) OR tw:( inah) OR ti:( INH) OR tw:(inh burgthal ) OR tw:( inh intoxication) OR tw:( inh toxicity) OR tw:( inizid) OR tw:( inizide) OR tw:( iscotin ) OR tw:( iscotine) OR tw:( isidrina) OR tw:( isidrine) OR tw:( ismazide) OR tw:( isobicina) OR tw:( isobicine) OR tw:( isocid) OR tw:( isocidene) OR tw:( isocotin) OR tw:( isocotine) OR tw:( isokin ) OR tw:( isokin t ) OR tw:( isolyn) OR tw:( isolyne) OR tw:( isomazide) OR tw:( isomerina) OR tw:( isonerit) OR tw:( isonex ) OR tw:( isoniac) OR tw:( isoniacid) OR tw:( isoniazid atlantic) OR tw:( isoniazid excretion) OR tw:( isoniazid intoxication) OR tw:( isoniazid sensitivity) OR tw:( isoniazid toxicity) OR tw:( isoniazida n.t.) OR tw:( isoniazide) OR tw:( isoniazidine) OR tw:( isoniazidum) OR tw:( isoniazone) OR tw:( isonicazid) OR tw:( isonicazide) OR tw:( isonicid) OR tw:( isonicide) OR tw:( isonicotan) OR tw:( isonicotane) OR tw:( isonicotic acid hydrazide) OR tw:( isonicotil) OR tw:( isonicotinic acid hydrazide) OR tw:( isonicotinic acid hydrazine) OR tw:( isonicotinic hydrazide) OR tw:( isonicotinohydrazide) OR tw:( isonicotinoylhydrazine) OR tw:( isonicotinylhydrazide) OR tw:( isonicotinylhydrazine) OR tw:( isonide) OR tw:( isonidrin) OR tw:( isonidrine) OR tw:( isonikazid) OR tw:( isonikazide) OR tw:( isonilex) OR tw:( isonilyd) OR tw:( isonin) OR tw:( isonindon) OR tw:( isonindone) OR tw:( isonine) OR tw:( isonirit) OR tw:( isonisin) OR tw:( isonisine) OR tw:( isoniton) OR tw:( isonitone) OR tw:( isonivit) OR tw:( isonizide) OR tw:( isopharmide) OR tw:( isotamine) OR tw:( isotebe) OR tw:( isotebezid) OR tw:( isotebezide) OR tw:( isothiavit) OR tw:( isotinyl) OR tw:( isozide) OR tw:( isozin) OR tw:( isozine) OR tw:( isozone) OR tw:( isozyd) OR tw:( isozyde) OR tw:( izoniazid) OR tw:( laniazid) OR tw:( medic aid isoniazid) OR tw:( micosan) OR tw:( micosane) OR tw:( milazide) OR tw:( mybasan) OR tw:( mybasane) OR tw:( neoteben) OR tw:( neotebene) OR tw:( neoxin) OR tw:( neoxine) OR tw:( neoxon) OR tw:( neoxone) OR tw:( neumandin) OR tw:( nevin) OR tw:( niadrin) OR tw:( nicatibine) OR tw:( nicazid) OR tw:( nicazide) OR tw:( nicetal) OR tw:( nicizina) OR tw:( nicodrin) OR tw:( niconyl) OR tw:( nicosciorin) OR tw:( nicotibin) OR tw:( nicotibina) OR tw:( nicotibine ) OR tw:( nicotubin) OR tw:( nicotubine) OR tw:( nicozid) OR tw:( nicozide ) OR tw:( nicozyd) OR tw:( nidaton) OR tw:( nidrazid) OR tw:( nidrazide) OR tw:( nikozid) OR tw:( nikozide) OR tw:( niosciorine) OR tw:( niplen) OR tw:( nitadon) OR tw:( niteban) OR tw:( nortibina) OR tw:( nortibine) OR tw:( nydrazid) OR tw:( nydrazide ) OR tw:( nyscozid) OR tw:( nyscozide) OR tw:( pelazid) OR tw:( pelazide) OR tw:( percin) OR tw:( phthisen) OR tw:( pms isoniazid) OR tw:( puran) OR tw:( pycazide) OR tw:( pyreazid) OR tw:( pyreazide) OR tw:( pyricidin) OR tw:( pyricidine) OR tw:( pyridine 4 carbohydrazide) OR tw:( pyridine 4 carbonic acid hydrazide) OR</p> |
|----|---------------------------------------------------------------------------------------------------------------------------------------------------------------------------------------------------------------------------------------------------------------------------------------------------------------------------------------------------------------------------------------------------------------------------------------------------------------------------------------------------------------------------------------------------------------------------------------------------------------------------------------------------------------------------------------------------------------------------------------------------------------------------------------------------------------------------------------------------------------------------------------------------------------------------------------------------------------------------------------------------------------------------------------------------------------------------------------------------------------------------------------------------------------------------------------------------------------------------------------------------------------------------------------------------------------------------------------------------------------------------------------------------------------------------------------------------------------------------------------------------------------------------------------------------------------------------------------------------------------------------------------------------------------------------------------------------------------------------------------------------------------------------------------------------------------------------------------------------------------------------------------------------------------------------------------------------------------------------------------------------------------------------------------------------------------------------------------------------------------------------------------------------------------------------------------------------------------------------------------------------------------------------------------------------------------------------------------------------------------------------------------------------------------------------------------------------------------------------------------------------------------------------------------------------------------------------------------------------------------------------------------------------------------------------------------------------------------------------------------------------------------------------------------------------------------------------------------------------------------------------------------------------------------------------------------------------------------------------------------------------------------------------------------------------------------------------------------------------------------------------------------------------------------------------------------------------------------------------------------------------------------------------------------------------------------------------------------------------------------------------------------------------------------------------------------------------------------------------------------------------------------------------------------------------------------------------------------------------------------------------------------------------------------------------------------------------------------------------------------------------------------------------------------------------------------------------------------------------------------------------------------------------------------------------------------------------------------------------------------------------------------------------------------------------------------------------------------------------------------------------------------------------------------------------------------------------------------------------------------------------------------------------------------|

|    |                                                                                                                                                                                                                                                                                                                                                                                                                                                                                                                                                                                                                                                                                                                                                                                                                                                                                                                                                                                                                                                                                                                                                                                                                                                                                                                                                                                                                                                                                                                                                                                                                                                                                                                                 |
|----|---------------------------------------------------------------------------------------------------------------------------------------------------------------------------------------------------------------------------------------------------------------------------------------------------------------------------------------------------------------------------------------------------------------------------------------------------------------------------------------------------------------------------------------------------------------------------------------------------------------------------------------------------------------------------------------------------------------------------------------------------------------------------------------------------------------------------------------------------------------------------------------------------------------------------------------------------------------------------------------------------------------------------------------------------------------------------------------------------------------------------------------------------------------------------------------------------------------------------------------------------------------------------------------------------------------------------------------------------------------------------------------------------------------------------------------------------------------------------------------------------------------------------------------------------------------------------------------------------------------------------------------------------------------------------------------------------------------------------------|
|    | tw:( pyridine 4 carboxyhydrazide) OR tw:( pyrizidin) OR tw:( pyrizidine) OR tw:( ramnanon) OR tw:( raumanon) OR tw:( retozide) OR tw:( rhymicid) OR tw:( rimicid ) OR tw:( rimicide) OR tw:( rimifon ) OR tw:( rimitsid) OR tw:( robisellin) OR tw:( robiselline) OR tw:( roxyfen miquel) OR tw:( rp 5015) OR tw:( ru ef tb) OR tw:( sanohydrazina) OR tw:( sanohydrazine) OR tw:( santerazid) OR tw:( santerazide) OR tw:( sauterazid) OR tw:( serum isoniazid) OR tw:( stanozide) OR tw:( supercidin) OR tw:( t.b. razide) OR tw:( tb phlogin ) OR tw:( tb phlogin heyl) OR tw:( tb vis) OR tw:( tebecid) OR tw:( tebecide) OR tw:( tebecin) OR tw:( tebecine) OR tw:( tebenic) OR tw:( tebesium) OR tw:( tebetracin) OR tw:( tebetracine) OR tw:( tebexin) OR tw:( tebexine) OR tw:( tebilon) OR tw:( tebilone) OR tw:( tebos) OR tw:( teebaconin) OR tw:( teebaconine) OR tw:( tekazin) OR tw:( tekazine) OR tw:( thiocevit) OR tw:( tibazide) OR tw:( tibemid) OR tw:( tibemide) OR tw:( tibunide) OR tw:( tibison) OR tw:( tibisone) OR tw:( tibitan) OR tw:( tibitane) OR tw:( tibivis) OR tw:( tibizide) OR tw:( tibusan) OR tw:( tibusane) OR tw:( tisin) OR tw:( tisiodrazida) OR tw:( tisiodrazide) OR tw:( tisiotrazida) OR tw:( tizide) OR tw:( tubazid) OR tw:( tubazide) OR tw:( tubeco) OR tw:( tubercid) OR tw:( tuberian) OR tw:( tuberiane) OR tw:( tubicon) OR tw:( tubicone) OR tw:( tubilysin) OR tw:( tubomel) OR tw:( tubonil) OR tw:( tubylisin) OR tw:( tubylisine) OR tw:( tyrid) OR tw:( tyvid) OR tw:( tyvide) OR tw:( unicozyde) OR tw:( valifol) OR tw:( vazadrine) OR tw:( vederon) OR tw:( vederone) OR tw:( vitazide) OR tw:( yuhan-zid) OR tw:( zinadon) OR tw:( zinadone) OR tw:( zonazide) |
| #2 | mh:(Pregnant Women) OR mh:(Pregnancy) OR mh:(Pregnancy Complications) OR mh:(Maternal Health Services) OR mh:(Mothers) OR mh:(Maternal Death) OR mh:(Maternal-Fetal Relations) OR mh:(Maternal Exposure) OR mh:(Maternal Mortality) OR mh:(Maternal Behavior) OR tw:(pregnan*) OR tw:(Maternal*) OR tw:(mother*) OR tw:(child bearing) OR tw:(perinatal) OR tw:(Postnatal) OR tw:(peri-natal) OR tw:(post natal) OR tw:(ante natal) OR tw:(antenatal) OR tw:(Postpartum) OR tw:(puerperium) OR tw:(post partum) OR tw:( abortion*) OR tw:(abortive ) OR mh:(Abortion, Induced)                                                                                                                                                                                                                                                                                                                                                                                                                                                                                                                                                                                                                                                                                                                                                                                                                                                                                                                                                                                                                                                                                                                                                  |
| #3 | mh:(Tuberculosis) OR tw:(tuberculosis) OR tw:(Lupus Vulgaris) OR tw:(koch s disease) OR tw:(tubercul*) OR tw:(tuberculoma) OR tw:(Silicotuberculosis) OR mh:(Mycobacterium tuberculosis) OR ti:(TB)                                                                                                                                                                                                                                                                                                                                                                                                                                                                                                                                                                                                                                                                                                                                                                                                                                                                                                                                                                                                                                                                                                                                                                                                                                                                                                                                                                                                                                                                                                                             |
| #4 | #1 AND #2 AND #3                                                                                                                                                                                                                                                                                                                                                                                                                                                                                                                                                                                                                                                                                                                                                                                                                                                                                                                                                                                                                                                                                                                                                                                                                                                                                                                                                                                                                                                                                                                                                                                                                                                                                                                |

## Cochran Library

|    |                                                                                                                                                                                                                                                                                                                                                                                                                                                                                                                                                                                                                                                                                                                                                                                                                                                                                                                                                                                                                                                                                                                                                                                                                                                                                                                                                                   |
|----|-------------------------------------------------------------------------------------------------------------------------------------------------------------------------------------------------------------------------------------------------------------------------------------------------------------------------------------------------------------------------------------------------------------------------------------------------------------------------------------------------------------------------------------------------------------------------------------------------------------------------------------------------------------------------------------------------------------------------------------------------------------------------------------------------------------------------------------------------------------------------------------------------------------------------------------------------------------------------------------------------------------------------------------------------------------------------------------------------------------------------------------------------------------------------------------------------------------------------------------------------------------------------------------------------------------------------------------------------------------------|
| #1 | [mh isoniazid] OR isoniazid:ti,ab,kw OR andrazide:ti,ab,kw OR antimic:ti,ab,kw OR antimicina:ti,ab,kw OR antimicine:ti,ab,kw OR "antituberkulosum trogalen":ti,ab,kw OR apacizina:ti,ab,kw OR armacide:ti,ab,kw OR armazide:ti,ab,kw OR atcotibin:ti,ab,kw OR atcotibine:ti,ab,kw OR azuren:ti,ab,kw OR cedin:ti,ab,kw OR "cedin aerosol":ti,ab,kw OR cemidon:ti,ab,kw OR chemiazid:ti,ab,kw OR chemidon:ti,ab,kw OR "cin vis":ti,ab,kw OR cortinazine:ti,ab,kw OR cotinazin:ti,ab,kw OR cotinazine:ti,ab,kw OR cotinizin:ti,ab,kw OR cotinizine:ti,ab,kw OR "curazid forte":ti,ab,kw OR defonin:ti,ab,kw OR dianicotyl:ti,ab,kw OR diazid:ti,ab,kw OR dibutin:ti,ab,kw OR diforin:ti,ab,kw OR dinacrin:ti,ab,kw OR ditubin:ti,ab,kw OR dow-isoniazid:ti,ab,kw OR ebidene:ti,ab,kw OR eralon:ti,ab,kw OR eralone:ti,ab,kw OR ertuban:ti,ab,kw OR europlex:ti,ab,kw OR eutizon:ti,ab,kw OR eutizone:ti,ab,kw OR evalon:ti,ab,kw OR fimalene:ti,ab,kw OR fimaline:ti,ab,kw OR "fsr 3":ti,ab,kw OR fsr3:ti,ab,kw OR gink:ti,ab,kw OR hain:ti,ab,kw OR hiconyl:ti,ab,kw OR hidraciber:ti,ab,kw OR hidranizil:ti,ab,kw OR hidrasonil:ti,ab,kw OR hidrazida:ti,ab,kw OR hidrazida i.n.:ti,ab,kw OR hidrulte:ti,ab,kw OR hycozid:ti,ab,kw OR hycozide:ti,ab,kw OR hydrasonil:ti,ab,kw OR hydrazid:ti,ab,kw OR "hydrazid polfa":ti,ab,kw OR "hydrazide polfa":ti,ab,kw OR |
|----|-------------------------------------------------------------------------------------------------------------------------------------------------------------------------------------------------------------------------------------------------------------------------------------------------------------------------------------------------------------------------------------------------------------------------------------------------------------------------------------------------------------------------------------------------------------------------------------------------------------------------------------------------------------------------------------------------------------------------------------------------------------------------------------------------------------------------------------------------------------------------------------------------------------------------------------------------------------------------------------------------------------------------------------------------------------------------------------------------------------------------------------------------------------------------------------------------------------------------------------------------------------------------------------------------------------------------------------------------------------------|

hydrazin:ti,ab,kw OR hyzyd:ti,ab,kw OR "ido tebin":ti,ab,kw OR "idrazil inh":ti,ab,kw OR "in 73":ti,ab,kw OR inah:ti,ab,kw  
 OR INH:ti OR "inh burgthal":ti,ab,kw OR "inh intoxication":ti,ab,kw OR "inh toxicity":ti,ab,kw OR inizid:ti,ab,kw OR  
 inizide:ti,ab,kw OR iscotin:ti,ab,kw OR iscotine:ti,ab,kw OR isidrina:ti,ab,kw OR isidrine:ti,ab,kw OR ismazide:ti,ab,kw OR  
 isobicina:ti,ab,kw OR isobicine:ti,ab,kw OR isocid:ti,ab,kw OR isocidene:ti,ab,kw OR isocotin:ti,ab,kw OR isocotine:ti,ab,kw  
 OR isokin:ti,ab,kw OR "isokin t":ti,ab,kw OR isolyn:ti,ab,kw OR isolyne:ti,ab,kw OR isomazide:ti,ab,kw OR  
 isomerina:ti,ab,kw OR isonerit:ti,ab,kw OR isonex:ti,ab,kw OR isoniac:ti,ab,kw OR isoniacid:ti,ab,kw OR "isoniazid  
 atlantic":ti,ab,kw OR "isoniazid excretion":ti,ab,kw OR "isoniazid intoxication":ti,ab,kw OR "isoniazid sensitivity":ti,ab,kw OR  
 "isoniazid toxicity":ti,ab,kw OR "isoniazida n.t.":ti,ab,kw OR isoniazide:ti,ab,kw OR isoniazidine:ti,ab,kw OR  
 isoniazidum:ti,ab,kw OR isoniazone:ti,ab,kw OR isonicazid:ti,ab,kw OR isonicazide:ti,ab,kw OR isonicid:ti,ab,kw OR  
 isonicide:ti,ab,kw OR isonicotan:ti,ab,kw OR isonicotane:ti,ab,kw OR "isonicotinic acid hydrazide":ti,ab,kw OR isonicotil:ti,ab,kw  
 OR "isonicotinic acid hydrazide":ti,ab,kw OR "isonicotinic acid hydrazine":ti,ab,kw OR "isonicotinic hydrazide":ti,ab,kw OR  
 isonicotinohydrazide:ti,ab,kw OR isonicotinoylhydrazine:ti,ab,kw OR isonicotinylhydrazide:ti,ab,kw OR  
 isonicotinylhydrazine:ti,ab,kw OR isonide:ti,ab,kw OR isonidrin:ti,ab,kw OR isonidrine:ti,ab,kw OR isonikazid:ti,ab,kw OR  
 isonikazide:ti,ab,kw OR isonilex:ti,ab,kw OR isonilyd:ti,ab,kw OR isonin:ti,ab,kw OR isonindon:ti,ab,kw OR  
 isonindone:ti,ab,kw OR isonine:ti,ab,kw OR isonirit:ti,ab,kw OR isonisin:ti,ab,kw OR isonisine:ti,ab,kw OR isoniton:ti,ab,kw  
 OR isonitone:ti,ab,kw OR isonivit:ti,ab,kw OR isonizide:ti,ab,kw OR isopharmide:ti,ab,kw OR isotamine:ti,ab,kw OR  
 isotebe:ti,ab,kw OR isotebezid:ti,ab,kw OR isotebezide:ti,ab,kw OR isothiavit:ti,ab,kw OR isotinyl:ti,ab,kw OR isozide:ti,ab,kw  
 OR isozin:ti,ab,kw OR isozine:ti,ab,kw OR isozone:ti,ab,kw OR isozyd:ti,ab,kw OR isozyde:ti,ab,kw OR izoniazid:ti,ab,kw OR  
 laniazid:ti,ab,kw OR "medic aid isoniazid":ti,ab,kw OR micosan:ti,ab,kw OR micosane:ti,ab,kw OR milazide:ti,ab,kw OR  
 mybasan:ti,ab,kw OR mybasane:ti,ab,kw OR neoteben:ti,ab,kw OR neotebene:ti,ab,kw OR neoxin:ti,ab,kw OR neoxine:ti,ab,kw  
 OR neoxon:ti,ab,kw OR neoxone:ti,ab,kw OR neumandin:ti,ab,kw OR nevin:ti,ab,kw OR niadrin:ti,ab,kw OR  
 nicatibine:ti,ab,kw OR nicazid:ti,ab,kw OR nicazide:ti,ab,kw OR nicetal:ti,ab,kw OR nicizina:ti,ab,kw OR nicodrin:ti,ab,kw OR  
 niconyl:ti,ab,kw OR nicosciorin:ti,ab,kw OR nicotibin:ti,ab,kw OR nicotibina:ti,ab,kw OR nicotibine:ti,ab,kw OR  
 nicotubin:ti,ab,kw OR nicotubine:ti,ab,kw OR nicozid:ti,ab,kw OR nicozide:ti,ab,kw OR nicozyd:ti,ab,kw OR nidaton:ti,ab,kw  
 OR nidrazid:ti,ab,kw OR nidrazide:ti,ab,kw OR nikozid:ti,ab,kw OR nikozide:ti,ab,kw OR niosciorine:ti,ab,kw OR  
 niplen:ti,ab,kw OR nitadon:ti,ab,kw OR niteban:ti,ab,kw OR nortibina:ti,ab,kw OR nortibine:ti,ab,kw OR nydrazid:ti,ab,kw OR  
 nydrazide:ti,ab,kw OR nyscozid:ti,ab,kw OR nyscozide:ti,ab,kw OR pelazid:ti,ab,kw OR pelazide:ti,ab,kw OR percin:ti,ab,kw  
 OR phthisen:ti,ab,kw OR "pms isoniazid":ti,ab,kw OR puran:ti,ab,kw OR pycazide:ti,ab,kw OR pyreazid:ti,ab,kw OR  
 pyreazide:ti,ab,kw OR pyricidin:ti,ab,kw OR pyricidine:ti,ab,kw OR "pyridine 4 carbohydrazide":ti,ab,kw OR "pyridine 4  
 carbonic acid hydrazide":ti,ab,kw OR "pyridine 4 carboxyhydrazide":ti,ab,kw OR pyrizidin:ti,ab,kw OR pyrizidine:ti,ab,kw OR  
 ramnanon:ti,ab,kw OR raumanon:ti,ab,kw OR retozide:ti,ab,kw OR rhymicid:ti,ab,kw OR rimicid:ti,ab,kw OR rimicide:ti,ab,kw  
 OR rimifon:ti,ab,kw OR rimitsid:ti,ab,kw OR robisellin:ti,ab,kw OR robiselline:ti,ab,kw OR "roxyfen miquel":ti,ab,kw OR "rp  
 5015":ti,ab,kw OR "ru ef tb":ti,ab,kw OR sanohydrazina:ti,ab,kw OR sanohydrazine:ti,ab,kw OR santerazid:ti,ab,kw OR  
 santerazide:ti,ab,kw OR sauterazid:ti,ab,kw OR "serum isoniazid":ti,ab,kw OR stanozide:ti,ab,kw OR supercidin:ti,ab,kw OR  
 "t.b. razide":ti,ab,kw OR "tb phlogin":ti,ab,kw OR "tb phlogin heyl":ti,ab,kw OR "tb vis":ti,ab,kw OR tebecid:ti,ab,kw OR  
 tebecide:ti,ab,kw OR tebecin:ti,ab,kw OR tebecine:ti,ab,kw OR tebenic:ti,ab,kw OR tebesium:ti,ab,kw OR tebetracin:ti,ab,kw

|    |                                                                                                                                                                                                                                                                                                                                                                                                                                                                                                                                                                                                                                                                                                                                                                                                                                                                                                                                                                                                                                                                                                                                                                           |
|----|---------------------------------------------------------------------------------------------------------------------------------------------------------------------------------------------------------------------------------------------------------------------------------------------------------------------------------------------------------------------------------------------------------------------------------------------------------------------------------------------------------------------------------------------------------------------------------------------------------------------------------------------------------------------------------------------------------------------------------------------------------------------------------------------------------------------------------------------------------------------------------------------------------------------------------------------------------------------------------------------------------------------------------------------------------------------------------------------------------------------------------------------------------------------------|
|    | OR tebetracine:ti,ab,kw OR tebexin:ti,ab,kw OR tebexine:ti,ab,kw OR tebilon:ti,ab,kw OR tebilone:ti,ab,kw OR tebos:ti,ab,kw OR teebaconin:ti,ab,kw OR teebaconine:ti,ab,kw OR tekazin:ti,ab,kw OR tekazine:ti,ab,kw OR thiocevit:ti,ab,kw OR tibazide:ti,ab,kw OR tibemid:ti,ab,kw OR tibemide:ti,ab,kw OR tibinide:ti,ab,kw OR tibison:ti,ab,kw OR tibisone:ti,ab,kw OR tibitan:ti,ab,kw OR tibitane:ti,ab,kw OR tibivis:ti,ab,kw OR tibizide:ti,ab,kw OR tibusan:ti,ab,kw OR tibusane:ti,ab,kw OR tisin:ti,ab,kw OR tisiodrazida:ti,ab,kw OR tisiodrazide:ti,ab,kw OR tisiotrazida:ti,ab,kw OR tizide:ti,ab,kw OR tubazid:ti,ab,kw OR tubazide:ti,ab,kw OR tubeco:ti,ab,kw OR tubercid:ti,ab,kw OR tuberian:ti,ab,kw OR tuberiane:ti,ab,kw OR tubicon:ti,ab,kw OR tubicone:ti,ab,kw OR tubilysin:ti,ab,kw OR tubomel:ti,ab,kw OR tubonil:ti,ab,kw OR tubylisin:ti,ab,kw OR tubylisine:ti,ab,kw OR tyrid:ti,ab,kw OR tyvid:ti,ab,kw OR tyvide:ti,ab,kw OR unicozyde:ti,ab,kw OR valifol:ti,ab,kw OR vazadrine:ti,ab,kw OR vederon:ti,ab,kw OR vederone:ti,ab,kw OR vitazide:ti,ab,kw OR yuhan-zid:ti,ab,kw OR zinadon:ti,ab,kw OR zinadone:ti,ab,kw OR zonazide:ti,ab,kw |
| #2 | [mh "Pregnant Women"] OR [mh Pregnancy] OR [mh "Pregnancy Complications"] OR [mh "Maternal Health Services"] OR [mh Mothers] OR [mh "Maternal Death"] OR [mh "Maternal-Fetal Relations"] OR [mh "Maternal Exposure"] OR [mh "Maternal Mortality"] OR [mh "Maternal Behavior"] OR (pregnan*):ti,ab,kw OR (Maternal*):ti,ab,kw OR (mother*):ti,ab,kw OR ("child bearing"):ti,ab,kw OR (perinatal):ti,ab,kw OR (Postnatal):ti,ab,kw OR (peri-natal):ti,ab,kw OR ("post natal"):ti,ab,kw OR ("ante natal"):ti,ab,kw OR (antenatal):ti,ab,kw OR (Postpartum):ti,ab,kw OR (puerperium):ti,ab,kw OR ("post partum"):ti,ab,kw OR (abortion*):ti,ab,kw OR (abortive ):ti,ab,kw OR [mh "Abortion, Induced"]                                                                                                                                                                                                                                                                                                                                                                                                                                                                         |
| #3 | [mh Tuberculosis] OR (tuberculosis):ti,ab,kw OR ("Lupus Vulgaris"):ti,ab,kw OR ("koch s disease"):ti,ab,kw OR (tubercul*):ti,ab,kw OR (tuberculoma):ti,ab,kw OR (Silicotuberculosis):ti,ab,kw OR [mh "Mycobacterium tuberculosis"] OR (TB):ti                                                                                                                                                                                                                                                                                                                                                                                                                                                                                                                                                                                                                                                                                                                                                                                                                                                                                                                             |
| #4 | #1 AND #2 AND #3                                                                                                                                                                                                                                                                                                                                                                                                                                                                                                                                                                                                                                                                                                                                                                                                                                                                                                                                                                                                                                                                                                                                                          |

## Appendix 2. Supplementary tables

**Table S1. Risk of bias assessment-Maternal outcomes**

*Table S1.1-randomized trial (RoB2)*

|                   | Randomization process | Deviations from intended interventions | Missing outcome data | Measurement of the outcome | Selection of the reported result | Overall      |
|-------------------|-----------------------|----------------------------------------|----------------------|----------------------------|----------------------------------|--------------|
| Gupta et al, 2019 | Low risk              | Low risk                               | Some concern         | Low risk                   | Low risk                         | Some concern |

*Table S1.2-Non-randomized studies*

|                            | Confounding  | Selection     | Classification | Deviation | Missing outcome data | Measurement of the outcome                                            | Selection of the reporting result | Overall       |
|----------------------------|--------------|---------------|----------------|-----------|----------------------|-----------------------------------------------------------------------|-----------------------------------|---------------|
| Chang et al, 2013*         | -            | Low risk      | Low risk       | -         | Moderate risk        | Moderate risk                                                         | -                                 | Moderate risk |
| Frank et al 1989*          | -            | Moderate risk | Moderate risk  | -         | Serious risk         | Serious risk                                                          | -                                 | Serious risk  |
| Kalk et al, 2018           | Serious risk | Risk          | Moderate risk  | Low risk  | No information       | Moderate risk for maternal deaths and serious risk for hepatotoxicity | Low risk                          | Serious risk  |
| Moro et al, 2018           | Serious risk | Serious risk  | Serious risk   | Low risk  | Moderate risk        | Low risk for death and serious risk for other adverse events          | Low risk                          | Serious risk  |
| Salazar-Nicole et al, 2019 | Serious risk | Low risk      | Low risk       | Low risk  | Low risk             | Low risk                                                              | Moderate risk                     | Serious risk  |
| Taylor et al, 2013         | Serious risk | Serious risk  | Moderate risk  | Low risk  | Moderate risk        | Low risk                                                              | Moderate risk                     | Serious risk  |
| Tiam et al, 2014*          | -            | Low risk      | Low risk       | -         | Moderate risk        | Moderate risk                                                         | -                                 | Moderate risk |

\*No control group as defined in the review. - indicates domains that were not assessed due to lack of a control group.

**Table S2. Risk of bias assessment-Pregnancy outcomes***Table S2.1-randomized trial (RoB2)*

|                   | Randomization process | Deviations from intended interventions | Missing outcome data | Measurement of the outcome | Selection of the reported result | Overall      |
|-------------------|-----------------------|----------------------------------------|----------------------|----------------------------|----------------------------------|--------------|
| Gupta et al, 2019 | Low risk              | Low risk                               | Some concern         | Low risk                   | Low risk                         | Some concern |

*Table S2.2-Non-randomized studies*

|                            | Confounding  | Selection    | Classification | Deviation | Missing outcome data | Measurement of the outcome | Selection of the reporting result | Overall      |
|----------------------------|--------------|--------------|----------------|-----------|----------------------|----------------------------|-----------------------------------|--------------|
| Kalk et al, 2018           | Serious risk | Low risk     | Moderate risk  | Low risk  | Serious risk         | Moderate risk              | Moderate risk                     | Serious risk |
| Moro et al, 2018           | Serious risk | Serious risk | Serious risk   | Low risk  | Moderate risk        | Serious risk               | Low risk                          | Serious risk |
| Msandiwa et al, 2009*      | -            | Serous risk  | Moderate risk  | -         | Moderate risk        | Low risk                   | -                                 | Serious risk |
| Salazar-Nicole et al, 2019 | Serious risk | Low risk     | Low risk       | Low risk  | Low risk             | Moderate risk              | Serious risk                      | Serious risk |
| Taylor et al, 2013         | Serious risk | Serious risk | Moderate risk  | Low risk  | Moderate risk        | Low risk                   | Moderate risk                     | Serious risk |

\*No control group as defined in the review. - indicates domains that were not assessed due to lack of a control group.

In the RCT by Gupta et al, 15.9% (76/477) in immediate IPT arm and 17.3% (83/479) in deferred IPT arm did not complete study mostly due to withdrawal or loss to follow-up. Time-to-last clinic visit was balanced between the two arms and hence risk of bias due to missing outcome data was considered of “some concern” rather than “serious”. The risk of bias was considered low in the other domains. Of the four NRS with a control group that reported pregnancy outcomes, all were considered at serious risk of bias due to inadequate control of confounding factors. Furthermore, two of them included only women who became pregnant after starting IPT during the trial and therefore they were considered at serious risk of selection bias. The study by Moro et al was considered at serious risk of bias in classification of interventions and outcomes, since that was estimated based on case reporting forms filled out inconsistently by study site staff. In the study by Kalk et al, pregnancy outcomes were missing in 35 % of women in the IPT group and 36% in those not put on IPT and therefore considered at serious risk of bias. In the study by Salazar-Austin et al, multiple composite outcomes were reported and there was no indication that they were defined *a priori*; hence the study was considered at serious risk of bias in selection of the reported results.



**Table S3. Hepatotoxicity in included studies**

|                    | Population                                                                          | Definition                                                                                                                                | Measurement                                                                                                      | IPT                                                                                                         | Control                       | Effect (95%CI)       |
|--------------------|-------------------------------------------------------------------------------------|-------------------------------------------------------------------------------------------------------------------------------------------|------------------------------------------------------------------------------------------------------------------|-------------------------------------------------------------------------------------------------------------|-------------------------------|----------------------|
| Chang et al, 2013  | Postpartum Women (>2 months after delivery) No HIV status reported.                 | ALT>3 times upper limit with symptoms or > 5 times upper limit normal regardless of symptoms                                              | If clinically indicated.                                                                                         | 1.9%* among postpartum women aged 18 to 35.                                                                 | NA                            | NA                   |
| Frank et al, 1989  | Women enrolled in prenatal IPT program                                              | Symptom of hepatitis with AST>4 times upper limit with no evidence to suggest other etiologies                                            | No routine LFT for asymptomatic women. LFT only for those with suggestive symptoms. Follow-up was every 3 months | 15-34years:3/3324 (0.09%)<br>3/1171 py (2.6/1000p-y)<br>35-44 years: 2/237 (0.8%)<br>2/88 py (22.7/1000p-y) | NA                            | NA                   |
| Gupta et al, 2019  | HIV-positive pregnant women                                                         | ≥ grade 3 liver enzyme elevation (LEE); ≥ grade 2 total bilirubin and ≥ grade 2 ALT; or ≥ grade 2 ALT with symptomatic clinical hepatitis | LFT performed at every visit                                                                                     | 18/477 (3.8%)#                                                                                              | Placebo 11/479 (2.3%)#        | RR 1.64 (0.78-3.44)  |
| Kalk et al, 2018   | HIV-positive pregnant women on or initiating ART                                    | ALT>=5x ULN                                                                                                                               | If clinically indicated                                                                                          | 30/10715 (0.3%)                                                                                             | No treatment 114/41227 (0.3%) | RR 1.01 (0.68-1.51)  |
| Moro et al, 2018   | Women who became pregnant during two parents trials. (All but one are HIV-negative) | 1)AST >= 5x ULN, regardless of signs or symptoms of hepatitis<br>2)AST >= 3x ULN, in the presence of signs or symptoms of hepatitis       | If clinically indicated or presence of baseline abnormality                                                      | 1/56 (1.8%)                                                                                                 | 3HP 0/31                      | RR 1.68 (0.07-40.1)* |
| Tiam et al, 2014   | HIV-positive pregnant women.                                                        | Not defined                                                                                                                               | If clinically indicated or presence of baseline abnormality                                                      | 0/124 (0%)                                                                                                  | NA                            | NA                   |
| Taylor et al, 2013 | HIV-positive pregnant women who became pregnant during a parent trial.              | Elevation of liver enzymes to >5 times the upper limit of normal.                                                                         | 2 weeks after enrollment and if clinically indicated                                                             | 0/103 (0%)                                                                                                  | NA                            | NA                   |

\*228 post-partum women were included in the study. No data on number of post-partum women aged 18-35 years old.

# The analysis was restricted to events occurred until 3 months post-partum. Some were still on IPT and were censored.

**Table S4. Grade 3 or 4 adverse events due to treatment in included studies**

|                   | Population                                                                          | Definition                                                                                                                                                                                                 | Measurement                                                                                                              | IPT           | Control                | Effect              |
|-------------------|-------------------------------------------------------------------------------------|------------------------------------------------------------------------------------------------------------------------------------------------------------------------------------------------------------|--------------------------------------------------------------------------------------------------------------------------|---------------|------------------------|---------------------|
| Gupta et al, 2019 | HIV-positive pregnant women                                                         | Treatment related Grade 3 or 4 as per DAIDS table                                                                                                                                                          | Visits occurred every 4 weeks during pregnancy, at labor and delivery, and every 4 weeks after delivery through 48 weeks | 34/477 (7.1%) | Placebo: 22/479 (4.6%) | RR 1.55 (0.92-2.61) |
| Moro et al, 2018  | Women who became pregnant during two parents trials. (All but one are HIV-negative) | All events were graded using the U.S. National Cancer Institute Common Toxicity Criteria, version 2.0.                                                                                                     | Monthly clinical monitoring                                                                                              | 1/56 (1.8%)   | 3HP: 0/31 (0%)         | RR 1.68 (0.07-40.1) |
| Tiam et al, 2014  | HIV-positive pregnant women.                                                        | Patients were assessed for side effects and toxicities related to INH, including gastrointestinal and central nervous system side effects, and peripheral neuropathy. None reported clinical side effects. | Monthly clinical monitoring.                                                                                             | 0/124 (0%)    | NA                     | NA                  |

**Table S5 Maternal deaths in included studies**

|                             | Population                                                                         | IPT                  | Control                        | Effect (95%CI)              |
|-----------------------------|------------------------------------------------------------------------------------|----------------------|--------------------------------|-----------------------------|
| Gupta et al, 2019           | HIV-positive pregnant women                                                        | 1/477 (0.2%)         | Placebo: 3/479 (0.6%)          | RR: 0.33 (0.03 - 3.21)      |
| Kalk et al, 2018            | HIV-positive pregnant women on or initiating ART                                   | INH: 18/10715 (0.2%) | No treatment: 103/41227 (0.3%) | RR: 0.67 (0.41-1.11)        |
| Moro et al, 2018            | Women who became pregnant during the two parent trials. (All but one HIV-negative) | INH: 0/56            | 3HP: 0/31                      | NA                          |
| Salazar-Austin, et al, 2019 | HIV-positive pregnant women                                                        | INH: 0/71            | No INH exposure: 2/84 (2%)     | RR: 0.24 (95%CI: 0.01-4.84) |
| Tiam et al, 2014            | HIV-positive pregnant women.                                                       | INH: 2/124 (1.6%)    | NA                             | NA                          |
| Taylor et al, 2013          | HIV-positive pregnant women who became pregnant during a parent trial.             | INH: 0/103           | No INH exposure: 0/93          | NA                          |

**Table S6. Composite adverse pregnancy outcomes in included studies**

|                            | Population                                                             | Composite outcomes                                                                                                                                                          | IPT               | Control            | Effect (95%CI)                                                                                |
|----------------------------|------------------------------------------------------------------------|-----------------------------------------------------------------------------------------------------------------------------------------------------------------------------|-------------------|--------------------|-----------------------------------------------------------------------------------------------|
| Gupta et al, 2019          | HIV-positive pregnant women                                            | Low birth weight, preterm delivery spontaneous abortion, stillbirth, or major congenital anomaly                                                                            | 106/449 (23.6%)   | 78/460 (16.0%)     | OR* 1.51 (1.09-2.10)                                                                          |
| Kalk et al, 2018           | HIV-positive pregnant women on or initiating ART                       | Low birth weight, preterm delivery, termination of pregnancy, still birth, or neonatal death                                                                                | 1093/6922 (16.9%) | 4687/26363 (19.5%) | OR 0.87 (0.81-0.93), unadjusted.                                                              |
| Taylor et al, 2013         | HIV-positive pregnant women who became pregnant during a parent trial. | Low birth weight, preterm delivery, spontaneous abortion, stillbirth, neonatal mortality (death of term infant within 28 days of delivery), or any noted congenital anomaly | 32/103 (31.1%)    | 40/93 (43.0%)      | OR 0.6 (0.3-1.1)<br>Adjusted by maternal age, BMI, CD4, and ART                               |
| Salazar-Austin et al, 2019 | HIV-positive pregnant women                                            | Low birth weight, preterm delivery, spontaneous abortion, stillbirth, and congenital anomaly                                                                                | 11/69 (15.9%)     | 23/82 (28.90%)     | OR 0.36 (0.14-0.88)<br>Adjusted by maternal age, CD4, viral load, PMTCT regimen, BMI, anemia. |

\*Mantel-Haenszel OR stratified by gestational age

**Table S7. Still birth, spontaneous abortion, or neonatal death in included studies.**

|                            | Population                                                                          | IPT             | Control                                       | Effect measure (95%CI)                                            |
|----------------------------|-------------------------------------------------------------------------------------|-----------------|-----------------------------------------------|-------------------------------------------------------------------|
| Gupta et al, 2019          | HIV-positive pregnant women                                                         | 21/459 (4.6%)   | Placebo 14/466 (3.0%)                         | RR 1.52 (0.78-2.96)                                               |
| Kalk et al, 2018           | HIV-positive pregnant women on or initiating ART                                    | 308/6922 (4.4%) | No treatment 1568/26363 (5.9%)                | RR 0.75 (0.66-0.84)                                               |
| Moro et al, 2018           | Women who became pregnant during two parents trials. (All but one are HIV-negative) | 8/56 (14%)      | No drug exposure: 5/39 (13%)<br>3HP:4/31(13%) | VS no exposure: RR 1.11 (0.39-3.15)<br>VS 3HP RR 1.11 (0.36-3.38) |
| Msandiwa et al, 2009       | HIV-positive women who became pregnant under the parent trial                       | 3/34* (9%)      | N/A                                           | NA                                                                |
| Salazar-Austin et al, 2019 | HIV-positive pregnant women                                                         | 2/69 (2.9%)     | No treatment 1/82 (1%)                        | RR 2.38 (0.22-25.7)                                               |

\*8/34 participants were exposed to rifamycin-containing regimens and were switched to INH alone or discontinued. Data on outcomes disaggregated by regimens were not available.

**Table S8. Prematurity in included studies.**

|                            | Population                                                    | Definition                                                                        | IPT              | control                         | Effect measure (95%CI) |
|----------------------------|---------------------------------------------------------------|-----------------------------------------------------------------------------------|------------------|---------------------------------|------------------------|
| Gupta et al, 2019          | HIV-positive pregnant women                                   | <37 weeks using the Ballard examination, when available, or obstetrical estimate) | 48/442 (10.9%)   | Placebo 40/458 (8.7%)           | RR 1.24 (0.83-1.85)    |
| Kalk et al, 2018           | HIV-positive pregnant women on or initiating ART              | <37 weeks                                                                         | 929/6922 (13.4%) | No treatment 3969/26363 (15.1%) | RR 0.89 (0.83-0.95)    |
| Msandiwa et al, 2009       | HIV-positive women who became pregnant under the parent trial | No information available                                                          | 1/34 (2.9%)      | N/A                             | NA                     |
| Salazar-Austin et al, 2019 | HIV-positive pregnant women                                   | Any <37 weeks                                                                     | 7/69 (10.1%)     | No treatment 18/82 (22.0%)      | RR 0.46 (0.21-1.04)    |

**Table S9. Low birth weight in included studies**

|                            | Population                                                    | Definition | INH               | control                        | Effect              |
|----------------------------|---------------------------------------------------------------|------------|-------------------|--------------------------------|---------------------|
| Gupta et al, 2019          | HIV-positive pregnant women                                   | <2500g     | 62/430 (14.4%)    | Placebo 46/446 (10.3%)         | RR 1.40 (0.98-2.00) |
| Kalk et al, 2018           | HIV-positive women who became pregnant under the parent trial | <2500g     | 1029/6922 (14.9%) | No treatment 4410/26363(16.7%) | RR 0.89 (0.83-0.95) |
| Salazar-Austin et al, 2019 | HIV-positive pregnant women                                   | <2500g     | 6/69 (8.7%)       | No treatment 10/82 (12.2%)     | RR 0.71(0.27-1.86)  |

**Table S10. Congenital anomaly in included studies**

|                            | Population                                                                          | Definition                                                                                                            | IPT           | Control                                  | Effect (95%CI)                            |
|----------------------------|-------------------------------------------------------------------------------------|-----------------------------------------------------------------------------------------------------------------------|---------------|------------------------------------------|-------------------------------------------|
| Gupta et al, 2019          | HIV-positive pregnant women                                                         | According to the Metropolitan Atlanta Congenital Defects Program of the US Centers for Disease Control and Prevention | 10/440 (2.3%) | Placebo 6/458 (1.3%)                     | RR 1.74 (0.64-4.73)                       |
| Moro et al, 2018           | Women who became pregnant during two parents trials. (All but one are HIV-negative) | Any report of congenital anomaly defined by the local investigator.                                                   | 2/41 (5%)     | No exposure: 1/32 (3%)<br>3HP: 0/20 (0%) | RR 1.56 (0.15-16.5)<br>RR 2.5 (0.13-49.8) |
| Salazar-Austin et al, 2019 | HIV-positive pregnant women                                                         | Not defined                                                                                                           | 1/69 (1.4%)   | No treatment 2/82 (2.4%)                 | RR 0.59 (0.06-6.41)                       |
